# Supplementary material for: Targeting the ERβ/HER Oncogenic Network in KRAS Mutant Lung Cancer Modulates the Tumor Microenvironment and Is Synergistic with Sequential Immunotherapy
Source: MDPI journal article supplement (doi:10.3390/ijms23010081), 2021-12-22

**Supplemental Figure S1.** FVBW-17 murine cancer cells express EGFR, HER2, HER3 ER $\beta$  and PD-L1. FVBW-17 whole cell lysates were immunoblotted with the indicated antibodies as described in Methods.

**Supplemental Figure S2.** Resting state BMDMs were plated on 96 well plates with 5,000 cells per well. The following day, fulvestrant (5 $\mu$ M) and/or dacomitinib (10 $\mu$ M) were added and incubated with the cells for 6hr, 24hr or 48hr at 37°C in humidified CO<sub>2</sub> incubator. Cell viability was determined using the Cell Titer Aqueous One Solution MTS assay (Promega, Madison, WI). Control values were set to 100 for relative cell proliferation. Cell Titer reagent (20 $\mu$ l) was added to each well and plates were incubated for 1 hour. Results are the mean  $\pm$  S.D. with 6 samples per experimental treatment.

**Supplemental Figure S3.** The gating strategy used to evaluate the CD45+/CD3+/CD8+/PD1+ and CD45+/CD11b+/F480+/CD206+ populations in the placebo control group is depicted.

**Supplemental Figure S4.** H&E staining of lungs from FVB/N mice engrafted with FVBW-17 cancer cells by tail vein injection. Representative sections of lungs from different treatment groups illustrate the histology of tumors detected. Lungs harvested after 2 weeks of therapy were subjected to H&E staining as described in Methods.

**Supplemental Table S1.** Primary antibodies used for western blotting and IHC.

| Antibody | Dilution | Manufacture |
|----------|----------|-------------|
|----------|----------|-------------|

|                                |        |                           |
|--------------------------------|--------|---------------------------|
| p-EGFR (Tyr1068)               | 1:1000 | Cell signaling Technology |
| p-HER2 (Tyr1221/1222)          | 1:1000 | Cell signaling Technology |
| p-HER3 (Tyr1289)               | 1:1000 | Cell signaling Technology |
| p-Akt (Ser473)                 | 1:1000 | Cell signaling Technology |
| p-MAPK (Tyr202/204)            | 1:1000 | Cell signaling Technology |
| p-Syk (Tyr525/526)             | 1:1000 | Cell signaling Technology |
| p-Src Family (Tyr416)          | 1:1000 | Cell signaling Technology |
| ER $\beta$ antibody (PAI-310B) | 1:1000 | Invitrogen                |
| PD-L1 (Ab213480)               | 1:1000 | Abcam                     |
| c-Myc                          | 1:1000 | Abcam                     |
| PR                             | 1:1000 | Abcam                     |
| VEGFA                          | 1:200  | Abcam                     |
| Mouse CD8                      | 1:1500 | Abcam                     |

**Supplemental Table S2.** Primer sequences for RT-qPCR analysis.

| Primer       | Sequence                                                                    |
|--------------|-----------------------------------------------------------------------------|
| <i>GAPDH</i> | forward 'GGAGCGAGATCCCTCCAAAAT-3'<br>reverse 5'GGCTGTTGTCATACTTCTCATGG-3'   |
| <i>IL-10</i> | forward 5'-CTG GAC AAC ATA CTG CTA ACC G-3,<br>reverse 5-GGGCATCACTTCTAC-3' |
| <i>CD206</i> | forward 5'CAGGTGTGGGCTCAGGTAGT 3',<br>reverse 5'TGTGGTGAGCTGAAAGGTGA 3'     |
| <i>Pdcd1</i> | forward 5'- ATGTGGGTCCGGCAGGTACC-3',<br>reverse 5'TCAAAGAGGCCAAGAACAATGTC3' |

**Supplemental Table S3.** Antibodies used for flow cytometry analysis.

| Antibody                         | Manufacture    |
|----------------------------------|----------------|
| Anti-mouse CD45 APC-eFluor 780   | eBiosciences   |
| Anti-mouse CD3e PerCP-Cy5.5      | BD Biosciences |
| Anti-mouse CD8a Super Bright 600 | eBiosciences   |

|                                 |                |
|---------------------------------|----------------|
| Anti-mouse CD279 (PD1) FITC     | Biolegend      |
| Anti-mouse CD45 APC-eFluor 780  | eBiosciences   |
| Anti-mouse CD11b APC            | BD Biosciences |
| Anti-mouse F480 Alexa Fluor 700 | Thermo Fisher  |
| Anti-mouse CD206 PE             | Biolegend      |

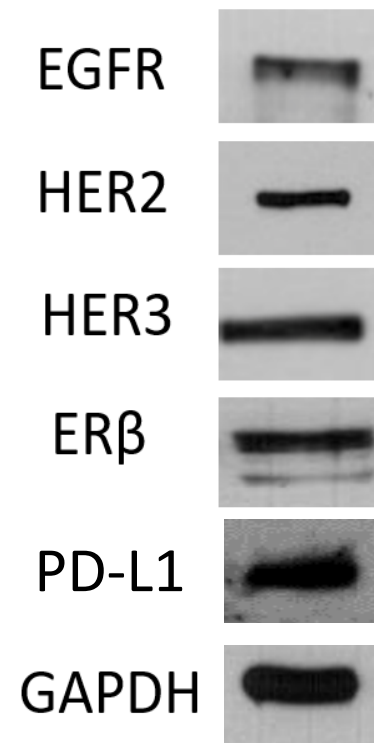

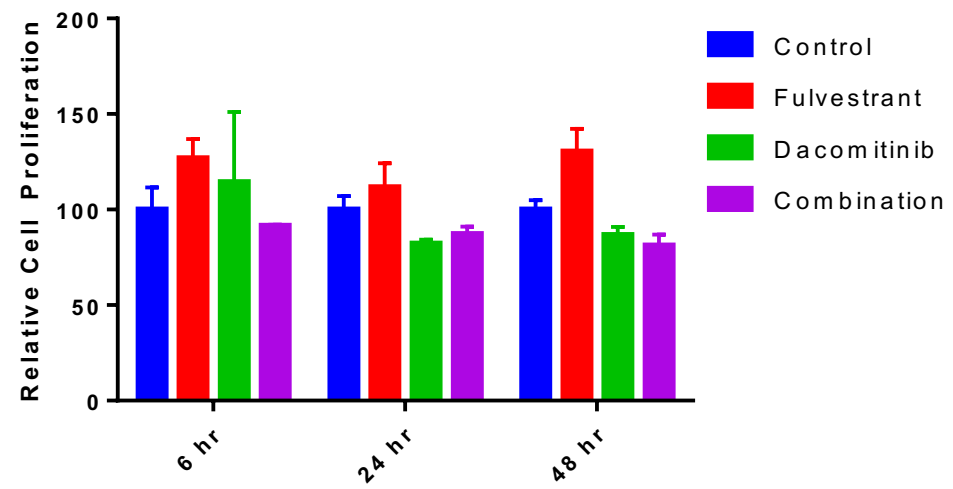

A

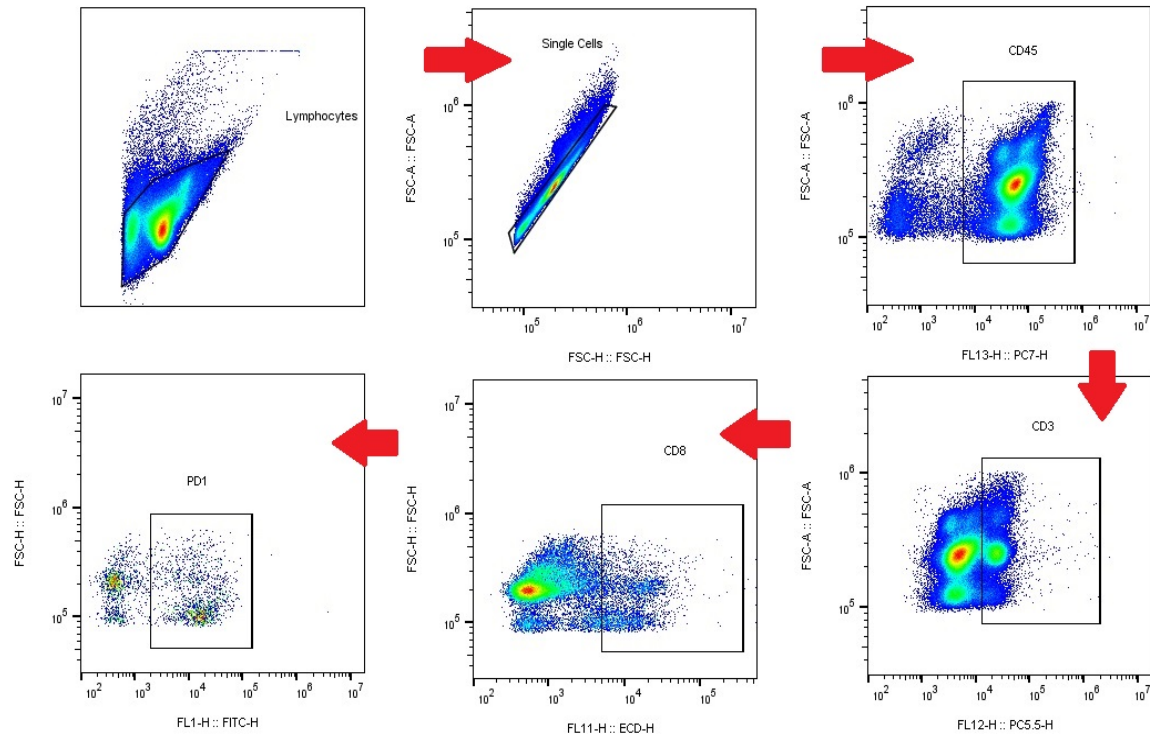

B

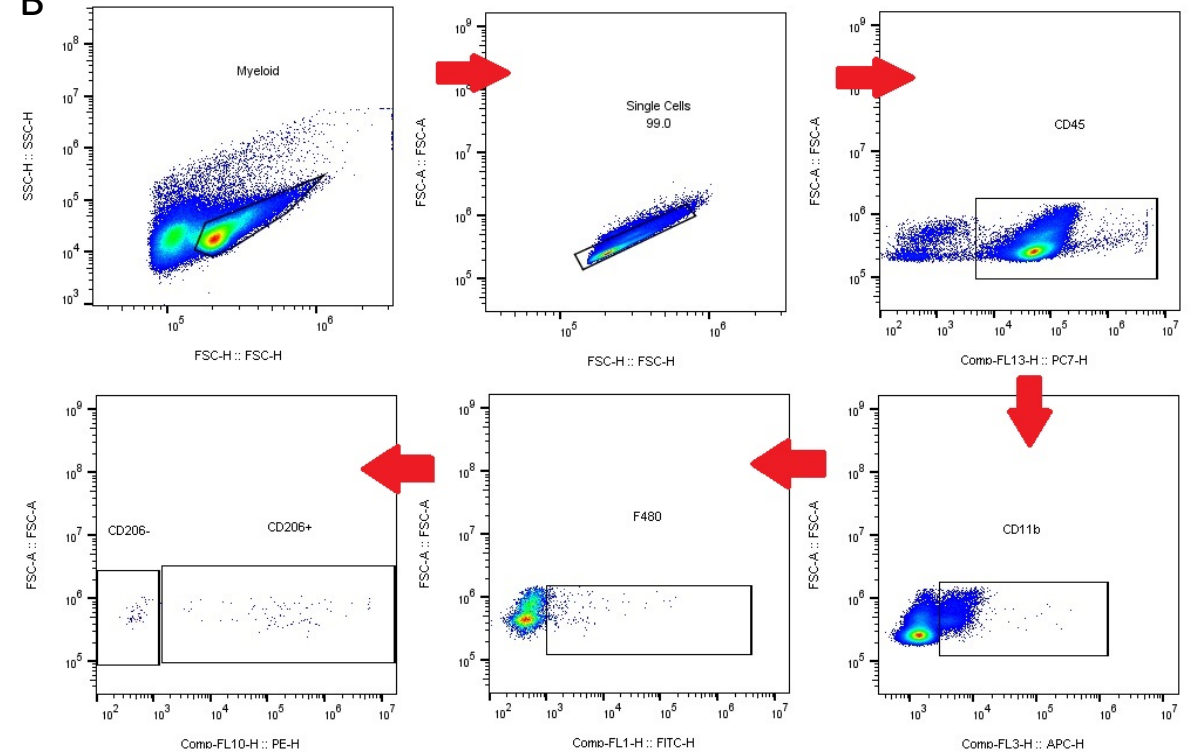

Placebo

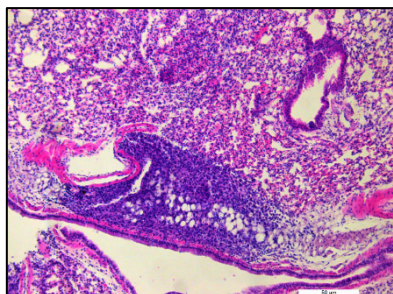

F+D

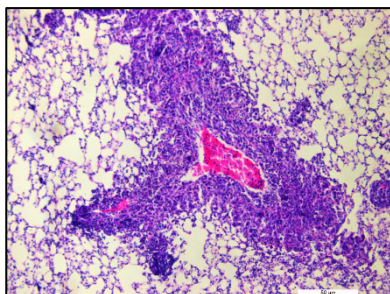

Anti-PD1

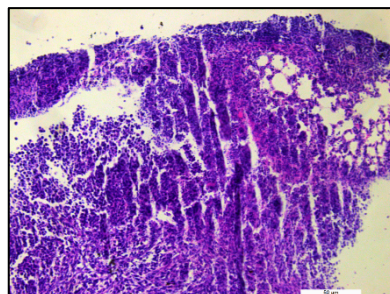

Triple therapy  
(concomitant)

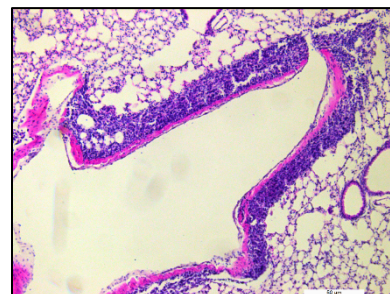

Triple therapy  
(Sequential)

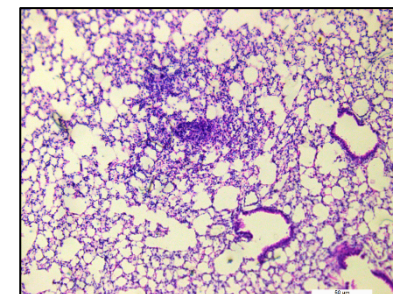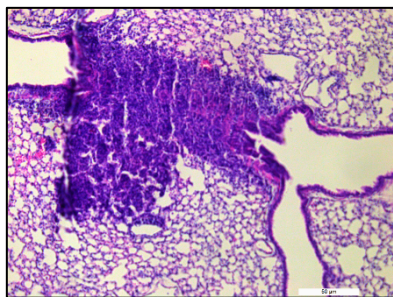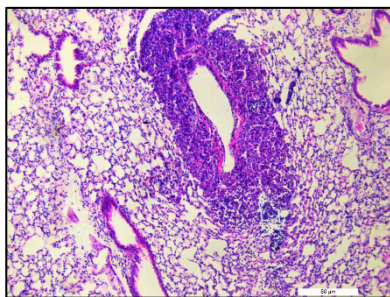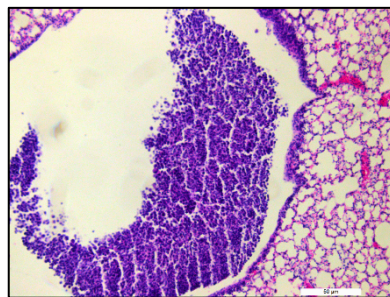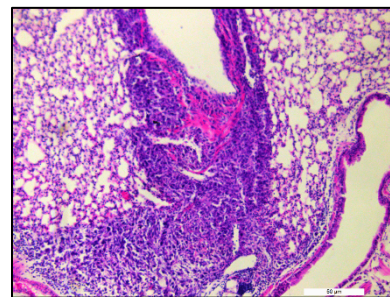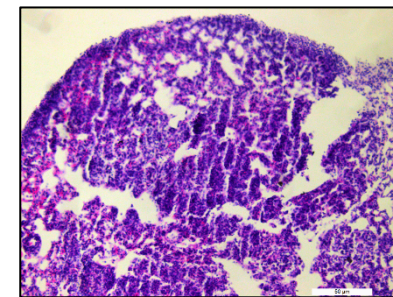

Supplement: s1 [file s1]
